# Supplementary material
Source: MDPI journal article supplement (https://www.mdpi.com/2304-6740/11/11/423)
Supplement: s1 [file s1]

**Parameters synthesis of Na-magadiite materials for water treatment: removal of basic  
blue-41. Properties and single batch design adsorber**

Abdulaziz M. Alanazi,<sup>1\*</sup> Hmoud Al Dmour,<sup>2</sup> Saheed A Popoola,<sup>1</sup> Hicham Oudghiri Hassani,<sup>3</sup>

Souad Rakass,<sup>4</sup> Rawan Al-Faze,<sup>5</sup> Fethi Kooli<sup>1\*</sup>

The equilibrium removal capacity (  $q_e$ , mg/g) of Na-magadiite samples for basic Blue-41 was computed by the Eq. S1.

$$q_e = \frac{(C_o - C_e)V}{m} \quad (S1)$$

The removal percentage (R %) of Na-magadiite samples for basic Blue-41 was computed by the Eq. S2.

$$R\% = \frac{(C_o - C_e) \times 100}{C_o} \quad (S2)$$

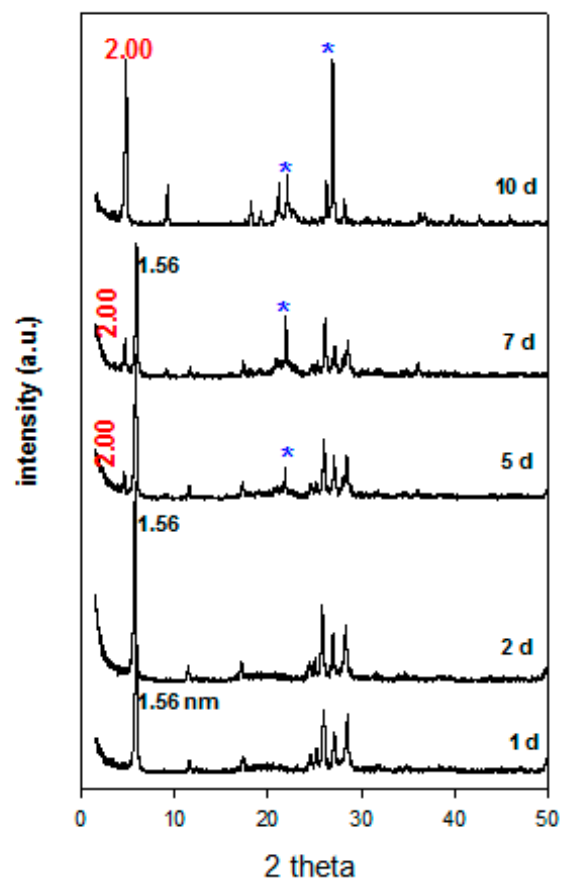

**Figure S1.** PXRD patterns of samples prepared from colloidal silica for different periods of times at 150 °C. \* corresponds to crystalline quartz phase.

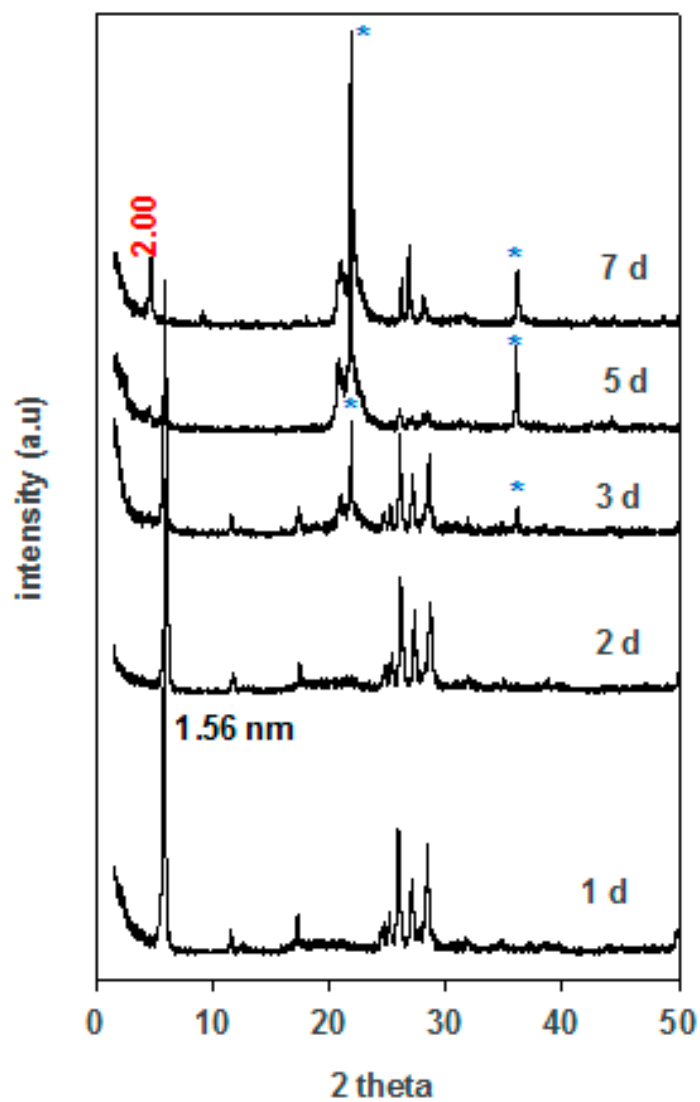

**Figure S2.** PXRD patterns of samples prepared from Ludox-HS40 for different periods of times at 150 °C. \* corresponds to crystalline silica phase.

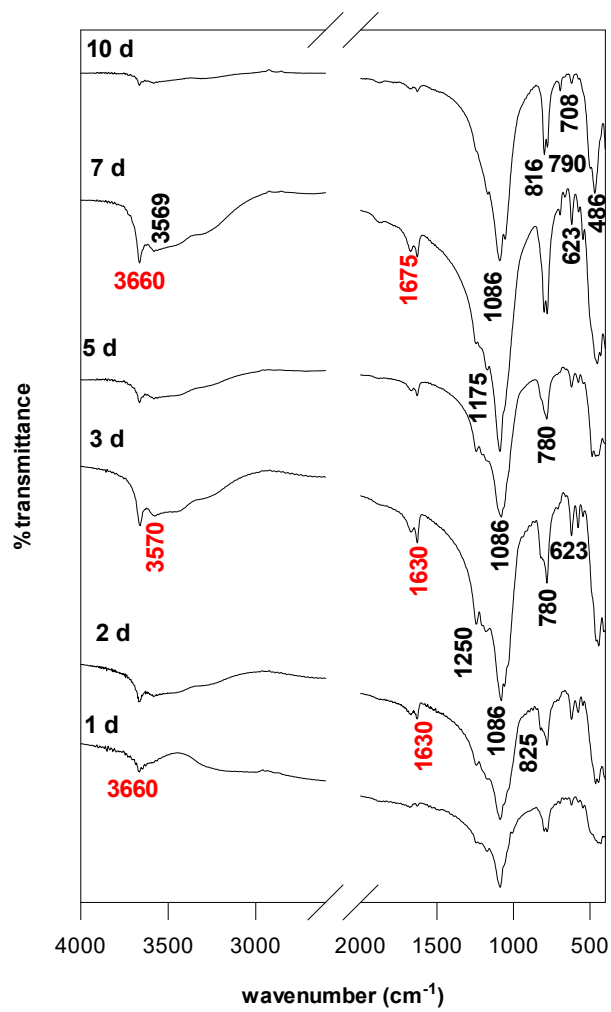

**Figure S3.** FTIR spectra of samples prepared from fumed silica at 150 °C for different periods of times

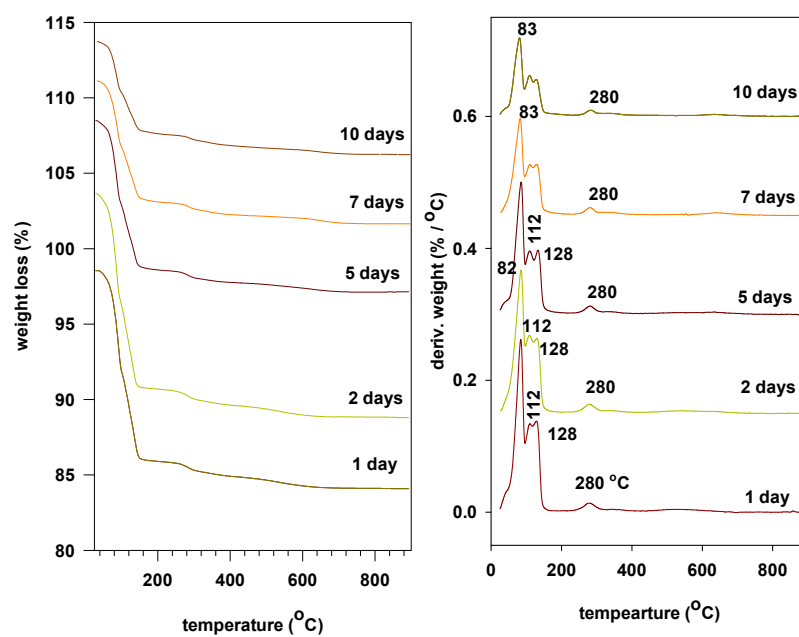

**Figure S4.** TGA (left) and DTG (right) features of products prepared from fumed silica at different periods of time and at 150 °C.

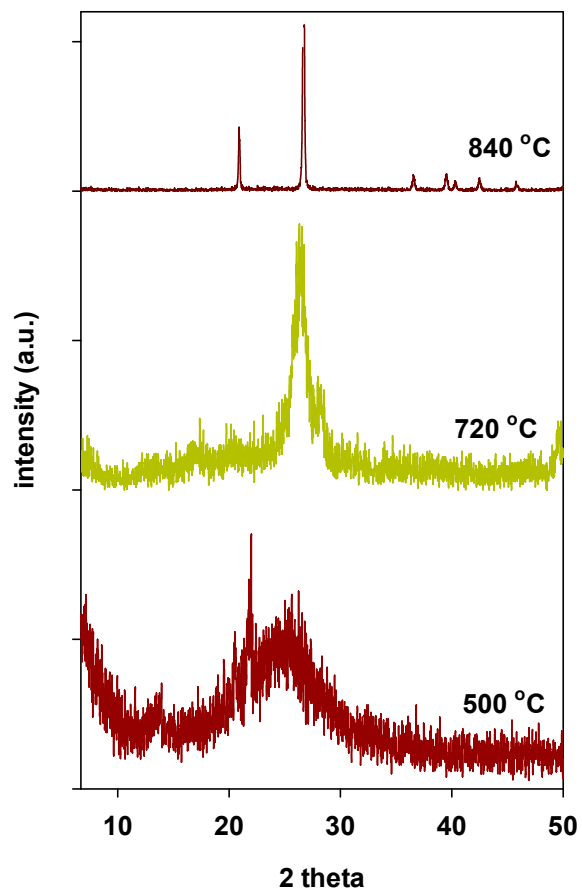

**Figure S5.** PXRD patterns of MAG-FS calcined at different temperatures. The sharp reflection at 840 °C corresponds to quartz phase.

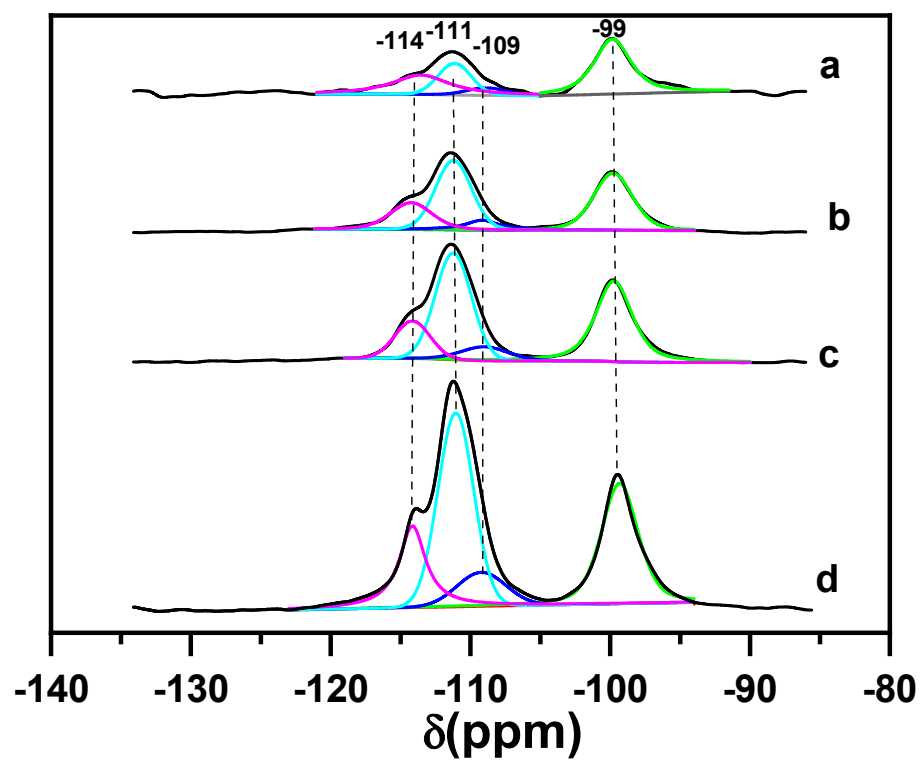

**Figure S6.** Deconvolution of resonance peaks of Na-magadiites prepared from different silica sources. (a) MAG-HS, (b) MAG-AS, (c) MAG-CS, and (d) MAG-FS.



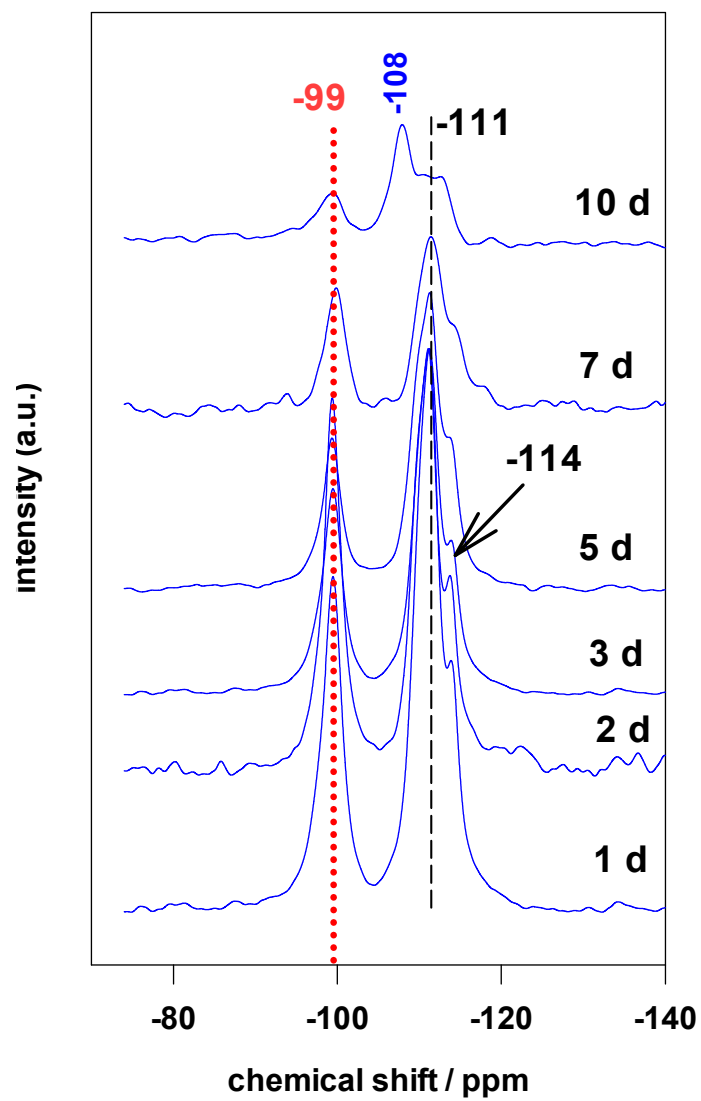

**Figure S7.**  $^{29}\text{Si}$  MAS NMR spectra of materials prepared from colloidal silica at  $150^\circ\text{C}$  for different periods of time, d= day (s)

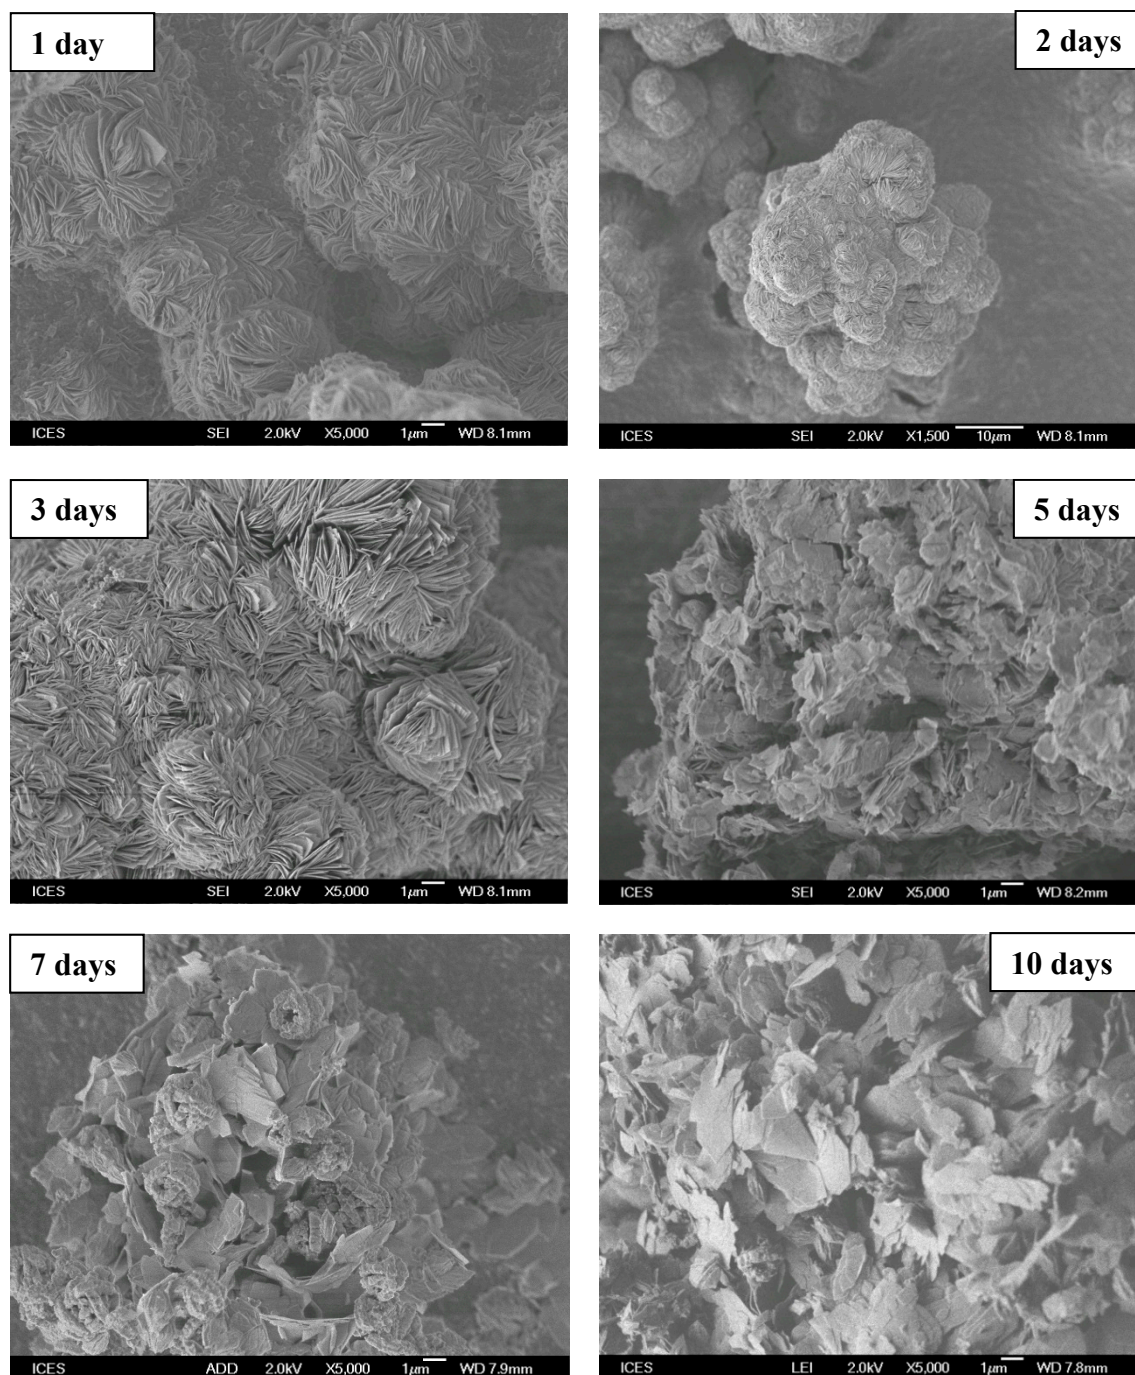

**Figure S8.** SEM micrographs of materials prepared from Ludox-AS40% for different period of times at 150 °C.
